# Supplementary material for: Evolution and Taxonomic Classification of Human Papillomavirus 16 (HPV16)-Related Variant Genomes: HPV31, HPV33, HPV35, HPV52, HPV58 and HPV67
Source: PubMed Central journal article supplement (PMC3103539; doi:10.1371/journal.pone.0020183), 2011-05-27
Supplement: pone.0020183.s002.pdf [file pone.0020183.s002.pdf]

|                    | E6            | E7        | E1             | E2                 | E4        | E5        | NCR2      | L2                        | L1                        | URR                                  |            |                                     |
|--------------------|---------------|-----------|----------------|--------------------|-----------|-----------|-----------|---------------------------|---------------------------|--------------------------------------|------------|-------------------------------------|
|                    | 1111122333355 | 667       | 89334668801237 | 799111123344446666 | 334444    | 8890      | 11111     | 12233356666899011222335   | 567889911223334455666770  | 0111223333444556666778               | 111        |                                     |
|                    | 2233729245704 | 274       | 98886051758432 | 268344622734674799 | 273467    | 2543      | 01223     | 916048925691899040467398  | 8938913444502593703444340 | 95896913891182313671571123678999000  | 111        |                                     |
|                    | 4716995616083 | 858       | 48364916225798 | 870127956711507725 | 671150    | 1685      | 97572     | 7544545473609942162559344 | 495842949953968100226737  | 460816532418015846249835636462125348 | 111        |                                     |
| HPV35 [REF]A1      | ATCTCTAATGGAG | TTG       | AGTTAACGTTGTAT | TCCACTCGGGCTACGAG  | GGCTAC    | ATTC      | TTTTC     | CGAGTAAAGCTAGGTA          | CTCGCTC                   | CCGGGAGGAAAGCA                       | TTCTTTGAAA | ACCGAGAGGA-AT-TTCTCTACCAGCGAGAGA-TG |
| HPV35 [QV19083]A1  | . . . . .     | . . . . . | . . . . .      | . . . . .          | . . . . . | . . . . . | . . . . . | . . . . .                 | . . . . .                 | . . . . .                            | . . . . .  | . . . . .                           |
| HPV35 [QV24067]A1  | . . . . .     | . . . . . | . . . . .      | . . . . .          | . . . . . | . . . . . | . . . . . | . . . . .                 | . . . . .                 | . . . . .                            | . . . . .  | . . . . .                           |
| HPV35 [QV19086]A1  | . . . . .     | . . . . . | . . . . .      | . . . . .          | . . . . . | . . . . . | . . . . . | . . . . .                 | . . . . .                 | . . . . .                            | . . . . .  | . . . . .                           |
| HPV35 [QV24860]A1  | . . . . .     | . . . . . | . . . . .      | . . . . .          | . . . . . | . . . . . | . . . . . | . . . . .                 | . . . . .                 | . . . . .                            | . . . . .  | . . . . .                           |
| HPV35 [Z141]A1     | . . . . .     | . . . . . | . . . . .      | . . . . .          | . . . . . | . . . . . | . . . . . | . . . . .                 | . . . . .                 | . . . . .                            | . . . . .  | . . . . .                           |
| HPV35 [Z049]A1     | . . . . .     | . . . . . | . . . . .      | . . . . .          | . . . . . | . . . . . | . . . . . | . . . . .                 | . . . . .                 | . . . . .                            | . . . . .  | . . . . .                           |
| HPV35 [Rw632]A1    | . . . . .     | . . . . . | . . . . .      | . . . . .          | . . . . . | . . . . . | . . . . . | . . . . .                 | . . . . .                 | . . . . .                            | . . . . .  | . . . . .                           |
| HPV35 [QV28721]A1  | . . . . .     | . . . . . | . . . . .      | . . . . .          | . . . . . | . . . . . | . . . . . | . . . . .                 | . . . . .                 | . . . . .                            | . . . . .  | . . . . .                           |
| HPV35 [QV24366]A1  | . . . . .     | . . . . . | . . . . .      | . . . . .          | . . . . . | . . . . . | . . . . . | . . . . .                 | . . . . .                 | . . . . .                            | . . . . .  | . . . . .                           |
| HPV35 [IN221713]A1 | . . . . .     | . . . . . | . . . . .      | . . . . .          | . . . . . | . . . . . | . . . . . | . . . . .                 | . . . . .                 | . . . . .                            | . . . . .  | . . . . .                           |
| HPV35 [BF266]A1    | . . . . .     | . . . . . | . . . . .      | . . . . .          | . . . . . | . . . . . | . . . . . | . . . . .                 | . . . . .                 | . . . . .                            | . . . . .  | . . . . .                           |
| HPV35 [Rw807]A1    | . . . . .     | . . . . . | . . . . .      | . . . . .          | . . . . . | . . . . . | . . . . . | . . . . .                 | . . . . .                 | . . . . .                            | . . . . .  | . . . . .                           |
| HPV35 [Rw862]A1    | . . . . .     | . . . . . | . . . . .      | . . . . .          | . . . . . | . . . . . | . . . . . | . . . . .                 | . . . . .                 | . . . . .                            | . . . . .  | . . . . .                           |
| HPV35 [Rw656]A2    | . . . . .     | . . . . . | . . . . .      | . . . . .          | . . . . . | . . . . . | . . . . . | . . . . .                 | . . . . .                 | . . . . .                            | . . . . .  | . . . . .                           |
| HPV35 [BF313]A2    | . . . . .     | . . . . . | . . . . .      | . . . . .          | . . . . . | . . . . . | . . . . . | . . . . .                 | . . . . .                 | . . . . .                            | . . . . .  | . . . . .                           |
| HPV35 [BF223]A2    | . . . . .     | . . . . . | . . . . .      | . . . . .          | . . . . . | . . . . . | . . . . . | . . . . .                 | . . . . .                 | . . . . .                            | . . . . .  | . . . . .                           |
| HPV35 [IN272089]A2 | . . . . .     | . . . . . | . . . . .      | . . . . .          | . . . . . | . . . . . | . . . . . | . . . . .                 | . . . . .                 | . . . . .                            | . . . . .  | . . . . .                           |
| HPV35 [BF314]A2    | . . . . .     | . . . . . | . . . . .      | . . . . .          | . . . . . | . . . . . | . . . . . | . . . . .                 | . . . . .                 | . . . . .                            | . . . . .  | . . . . .                           |
| HPV35 [BF025]A2    | . . . . .     | . . . . . | . . . . .      | . . . . .          | . . . . . | . . . . . | . . . . . | . . . . .                 | . . . . .                 | . . . . .                            | . . . . .  | . . . . .                           |
| HPV35 [Rw128]A2    | . . . . .     | . . . . . | . . . . .      | . . . . .          | . . . . . | . . . . . | . . . . . | . . . . .                 | . . . . .                 | . . . . .                            | . . . . .  | . . . . .                           |
| HPV35 [Z147]A2     | . . . . .     | . . . . . | . . . . .      | . . . . .          | . . . . . | . . . . . | . . . . . | . . . . .                 | . . . . .                 | . . . . .                            | . . . . .  | . . . . .                           |
| HPV35 [QV29782]A2  | . . . . .     | . . . . . | . . . . .      | . . . . .          | . . . . . | . . . . . | . . . . . | . . . . .                 | . . . . .                 | . . . . .                            | . . . . .  | . . . . .                           |
| HPV35 [QV31639]A2  | . . . . .     | . . . . . | . . . . .      | . . . . .          | . . . . . | . . . . . | . . . . . | . . . . .                 | . . . . .                 | . . . . .                            | . . . . .  | . . . . .                           |

|                    | E6          | E7                                              | E1                            | E2                      | E4        | E5        | NCR2      | L2        | L1        | URR       |           |
|--------------------|-------------|-------------------------------------------------|-------------------------------|-------------------------|-----------|-----------|-----------|-----------|-----------|-----------|-----------|
|                    | 2 778 1     | 4 2 6                                           | 1112 3 4 46 6 111 12222223 33 | 4 92 288444 70244551 22 | 55 1      | 35        | 2 2       | 66 3 5568 | 1 2 3333  | 8 1 44    | 33        |
| HPV35 [REF]A1      | H I W R Y E | D H D E I E V K F T S I D I T E R H L Y P A N D | P T D L                       | R V N D T S D T L       | A D       | S S       |           |           |           |           |           |
| HPV35 [QV19083]A1  | . . . . .   | . . . . .                                       | . . . . .                     | . . . . .               | . . . . . | . . . . . | . . . . . | . . . . . | . . . . . | . . . . . | . . . . . |
| HPV35 [QV24067]A1  | . . . . .   | . . . . .                                       | . . . . .                     | . . . . .               | . . . . . | . . . . . | . . . . . | . . . . . | . . . . . | . . . . . | . . . . . |
| HPV35 [QV19086]A1  | . . . . .   | . . . . .                                       | . . . . .                     | . . . . .               | . . . . . | . . . . . | . . . . . | . . . . . | . . . . . | . . . . . | . . . . . |
| HPV35 [QV24860]A1  | . . . . .   | . . . . .                                       | . . . . .                     | . . . . .               | . . . . . | . . . . . | . . . . . | . . . . . | . . . . . | . . . . . | . . . . . |
| HPV35 [Z141]A1     | . . . . .   | . . . . .                                       | . . . . .                     | . . . . .               | . . . . . | . . . . . | . . . . . | . . . . . | . . . . . | . . . . . | . . . . . |
| HPV35 [Z049]A1     | . . . . .   | . . . . .                                       | . . . . .                     | . . . . .               | . . . . . | . . . . . | . . . . . | . . . . . | . . . . . | . . . . . | . . . . . |
| HPV35 [Rw632]A1    | . . . . .   | . . . . .                                       | . . . . .                     | . . . . .               | . . . . . | . . . . . | . . . . . | . . . . . | . . . . . | . . . . . | . . . . . |
| HPV35 [QV28721]A1  | . . . . .   | . . . . .                                       | . . . . .                     | . . . . .               | . . . . . | . . . . . | . . . . . | . . . . . | . . . . . | . . . . . | . . . . . |
| HPV35 [QV24366]A1  | . . . . .   | . . . . .                                       | . . . . .                     | . . . . .               | . . . . . | . . . . . | . . . . . | . . . . . | . . . . . | . . . . . | . . . . . |
| HPV35 [IN221713]A1 | . . . . .   | . . . . .                                       | . . . . .                     | . . . . .               | . . . . . | . . . . . | . . . . . | . . . . . | . . . . . | . . . . . | . . . . . |
| HPV35 [BF266]A1    | . . . . .   | . . . . .                                       | . . . . .                     | . . . . .               | . . . . . | . . . . . | . . . . . | . . . . . | . . . . . | . . . . . | . . . . . |
| HPV35 [Rw807]A1    | . . . . .   | . . . . .                                       | . . . . .                     | . . . . .               | . . . . . | . . . . . | . . . . . | . . . . . | . . . . . | . . . . . | . . . . . |
| HPV35 [Rw862]A1    | . . . . .   | . . . . .                                       | . . . . .                     | . . . . .               | . . . . . | . . . . . | . . . . . | . . . . . | . . . . . | . . . . . | . . . . . |
| HPV35 [Rw656]A2    | . . . . .   | . . . . .                                       | . . . . .                     | . . . . .               | . . . . . | . . . . . | . . . . . | . . . . . | . . . . . | . . . . . | . . . . . |
| HPV35 [BF313]A2    | . . . . .   | . . . . .                                       | . . . . .                     | . . . . .               | . . . . . | . . . . . | . . . . . | . . . . . | . . . . . | . . . . . | . . . . . |
| HPV35 [BF223]A2    | . . . . .   | . . . . .                                       | . . . . .                     | . . . . .               | . . . . . | . . . . . | . . . . . | . . . . . | . . . . . | . . . . . | . . . . . |
| HPV35 [IN272089]A2 | . . . . .   | . . . . .                                       | . . . . .                     | . . . . .               | . . . . . | . . . . . | . . . . . | . . . . . | . . . . . | . . . . . | . . . . . |
| HPV35 [BF314]A2    | . . . . .   | . . . . .                                       | . . . . .                     | . . . . .               | . . . . . | . . . . . | . . . . . | . . . . . | . . . . . | . . . . . | . . . . . |
| HPV35 [BF025]A2    | . . . . .   | . . . . .                                       | . . . . .                     | . . . . .               | . . . . . | . . . . . | . . . . . | . . . . . | . . . . . | . . . . . | . . . . . |
| HPV35 [Rw128]A2    | . . . . .   | . . . . .                                       | . . . . .                     | . . . . .               | . . . . . | . . . . . | . . . . . | . . . . . | . . . . . | . . . . . | . . . . . |
| HPV35 [Z147]A2     | . . . . .   | . . . . .                                       | . . . . .                     | . . . . .               | . . . . . | . . . . . | . . . . . | . . . . . | . . . . . | . . . . . | . . . . . |
| HPV35 [QV29782]A2  | . . . . .   | . . . . .                                       | . . . . .                     | . . . . .               | . . . . . | . . . . . | . . . . . | . . . . . | . . . . . | . . . . . | . . . . . |
| HPV35 [QV31639]A2  | . . . . .   | . . . . .                                       | . . . . .                     | . . . . .               | . . . . . | . . . . . | . . . . . | . . . . . | . . . . . | . . . . . | . . . . . |

Note:  
1 deletion of 3 bp between sites nt. 4109 and 4111 within the NCR2 region;  
2 deletion of 11 bp between sites 7198 and 7208 within the URR region;  
3 insertion of 16 bp (TTTACTCTCAATTTG) between sites 7411 and 7412 within the URR region;  
4 insertion of 16 bp (TCTTACTCTCAATTTG) between sites 7411 and 7412 within the URR region;  
5 insertion of 29 bp (TGTGTTAGTGCATTCCTTCAATTTG) between sites 7411 and 7412 within the URR region;  
6 insertion of 20 bp (CACACACTTAACTCTTGTG) between sites 7521 and 7522 within the URR region;  
7 deletion of 9 bp between sites 7636 and 7644 within the URR region;  
8 insertion of 2 bp (GG) between sites 103 and 104 within the URR region;

Genomic coordinates and sequence data for HPV52. Columns include R6, R7, R1, E2, R4, NCRI, and R5. Sequences are shown for various regions such as REF1A, Qc32116A, Qc26382A, Qc23939A, Qc32479A, R6w46A, E2096A, Qc17972A, Qc17844A, Qc15145A, Qc03594B1, Qc05851B1, IN181391B2, Qc141070B2, Qc035867C1, Qc006151C2, Qc12371D, Qc02575D, Qc02124D, Qc18359D, and Qc07294D.

Sequence alignment and coordinates for HPV52. Columns include R6, R7, R1, E2, R4, NCRI, and R5. This table shows the alignment of sequences from different regions, highlighting differences and conserved areas. Coordinates are listed above each sequence.

Sequence alignment and coordinates for HPV52, labeled as NCR2. Columns include L2, L1, and URR. This table shows the alignment of sequences from different regions, highlighting differences and conserved areas. Coordinates are listed above each sequence.

HPV52 (REF1A) sequence data and mutation notes. Includes sequence coordinates and a list of mutations with their positions and descriptions. Mutations include insertions and deletions within the NCR2 region and URR region.

D

| E6               | E7                 | E8                 | E9                 | E10                | E11                   | E12                    | E13                         | E14              | E15              | E16              | E17              | E18              | E19              | E20              | E21              | E22              | E23              | E24              | E25              | E26              | E27              | E28              | E29              | E30              | E31              | E32              | E33              | E34              | E35              | E36              | E37              | E38              | E39              | E40              | E41              | E42           |               |
|------------------|--------------------|--------------------|--------------------|--------------------|-----------------------|------------------------|-----------------------------|------------------|------------------|------------------|------------------|------------------|------------------|------------------|------------------|------------------|------------------|------------------|------------------|------------------|------------------|------------------|------------------|------------------|------------------|------------------|------------------|------------------|------------------|------------------|------------------|------------------|------------------|------------------|------------------|---------------|---------------|
| 1111122233333334 | 5566677777777778   | 889999990000011    | 1111111111111111   | 1111111111111111   | 1111111111111111      | 1111111111111111       | 1111111111111111            | 1111111111111111 | 1111111111111111 | 1111111111111111 | 1111111111111111 | 1111111111111111 | 1111111111111111 | 1111111111111111 | 1111111111111111 | 1111111111111111 | 1111111111111111 | 1111111111111111 | 1111111111111111 | 1111111111111111 | 1111111111111111 | 1111111111111111 | 1111111111111111 | 1111111111111111 | 1111111111111111 | 1111111111111111 | 1111111111111111 | 1111111111111111 | 1111111111111111 | 1111111111111111 | 1111111111111111 | 1111111111111111 | 1111111111111111 | 1111111111111111 | 1111111111111111 |               |               |
| 348904460678904  | 591334666778900045 | 792424011500181302 | 882222214488046901 | 558915891481439100 | 448932616415200970274 | 1010111391447880953486 | 416253678903816188805567072 | 1631412765142    | 1618988559072176 | 6930             | 092788903874311  | 218628           | 479024           | 70284662058      | CTCCAGCTTAAAT    | CTCCAGCTTAAAT    | CTCCAGCTTAAAT    | CTCCAGCTTAAAT    | CTCCAGCTTAAAT    | CTCCAGCTTAAAT    | CTCCAGCTTAAAT    | CTCCAGCTTAAAT    | CTCCAGCTTAAAT    | CTCCAGCTTAAAT    | CTCCAGCTTAAAT    | CTCCAGCTTAAAT    | CTCCAGCTTAAAT    | CTCCAGCTTAAAT    | CTCCAGCTTAAAT    | CTCCAGCTTAAAT    | CTCCAGCTTAAAT    | CTCCAGCTTAAAT    | CTCCAGCTTAAAT    | CTCCAGCTTAAAT    | CTCCAGCTTAAAT    | CTCCAGCTTAAAT | CTCCAGCTTAAAT |
| HPV981RF1A1      | HPV981b0471A1      | HPV981b0101A1      | HPV981b01741A1     | HPV981b01441A1     | HPV981b01011A1        | HPV981b01741A1         | HPV981b01441A1              | HPV981b01011A1   | HPV981b01741A1   | HPV981b01441A1   | HPV981b01011A1   | HPV981b01741A1   | HPV981b01441A1   | HPV981b01011A1   | HPV981b01741A1   | HPV981b01441A1   | HPV981b01011A1   | HPV981b01741A1   | HPV981b01441A1   | HPV981b01011A1   | HPV981b01741A1   | HPV981b01441A1   | HPV981b01011A1   | HPV981b01741A1   | HPV981b01441A1   | HPV981b01011A1   | HPV981b01741A1   | HPV981b01441A1   | HPV981b01011A1   | HPV981b01741A1   | HPV981b01441A1   | HPV981b01011A1   | HPV981b01741A1   | HPV981b01441A1   | HPV981b01011A1   |               |               |

| E6          | E7            | E8            | E9             | E10            | E11            | E12            | E13            | E14            | E15            | E16            | E17            | E18            | E19            | E20            | E21            | E22            | E23            | E24            | E25            | E26            | E27            | E28            | E29            | E30            | E31            | E32            | E33            | E34            | E35            | E36            | E37            | E38            | E39            | E40            | E41            | E42 |  |  |
|-------------|---------------|---------------|----------------|----------------|----------------|----------------|----------------|----------------|----------------|----------------|----------------|----------------|----------------|----------------|----------------|----------------|----------------|----------------|----------------|----------------|----------------|----------------|----------------|----------------|----------------|----------------|----------------|----------------|----------------|----------------|----------------|----------------|----------------|----------------|----------------|-----|--|--|
| 1           | 34            | 8899          | 9              | 124            | 66             | 677            | 77             | 22             | 3              | 55566779       | 2              | 677            | 77             | 88             | 22             | 2              | 3333           | 333            | 4              | 44             | 55             | 55566          | 66             | 66             | 1              | 1              | 1              | 2222           | 2              | 22             | 2              | 222233         | 3              | 33             |                |     |  |  |
| HPV981RF1A1 | HPV981b0471A1 | HPV981b0101A1 | HPV981b01741A1 | HPV981b01441A1 | HPV981b01011A1 | HPV981b01741A1 | HPV981b01441A1 | HPV981b01011A1 | HPV981b01741A1 | HPV981b01441A1 | HPV981b01011A1 | HPV981b01741A1 | HPV981b01441A1 | HPV981b01011A1 | HPV981b01741A1 | HPV981b01441A1 | HPV981b01011A1 | HPV981b01741A1 | HPV981b01441A1 | HPV981b01011A1 | HPV981b01741A1 | HPV981b01441A1 | HPV981b01011A1 | HPV981b01741A1 | HPV981b01441A1 | HPV981b01011A1 | HPV981b01741A1 | HPV981b01441A1 | HPV981b01011A1 | HPV981b01741A1 | HPV981b01441A1 | HPV981b01011A1 | HPV981b01741A1 | HPV981b01441A1 | HPV981b01011A1 |     |  |  |

| E6               | E7               | E8               | E9               | E10              | E11              | E12              | E13              | E14              | E15              | E16              | E17              | E18              | E19              | E20              | E21              | E22              | E23              | E24              | E25              | E26              | E27              | E28              | E29              | E30              | E31              | E32              | E33              | E34              | E35              | E36              | E37              | E38              | E39              | E40              | E41              | E42 |
|------------------|------------------|------------------|------------------|------------------|------------------|------------------|------------------|------------------|------------------|------------------|------------------|------------------|------------------|------------------|------------------|------------------|------------------|------------------|------------------|------------------|------------------|------------------|------------------|------------------|------------------|------------------|------------------|------------------|------------------|------------------|------------------|------------------|------------------|------------------|------------------|-----|
| 4444444444444444 | 4444444444444444 | 4444444444444444 | 4444444444444444 | 4444444444444444 | 4444444444444444 | 4444444444444444 | 4444444444444444 | 4444444444444444 | 4444444444444444 | 4444444444444444 | 4444444444444444 | 4444444444444444 | 4444444444444444 | 4444444444444444 | 4444444444444444 | 4444444444444444 | 4444444444444444 | 4444444444444444 | 4444444444444444 | 4444444444444444 | 4444444444444444 | 4444444444444444 | 4444444444444444 | 4444444444444444 | 4444444444444444 | 4444444444444444 | 4444444444444444 | 4444444444444444 | 4444444444444444 | 4444444444444444 | 4444444444444444 | 4444444444444444 | 4444444444444444 | 4444444444444444 | 4444444444444444 |     |
| HPV981RF1A1      | HPV981b0471A1    | HPV981b0101A1    | HPV981b01741A1   | HPV981b01441A1   | HPV981b01011A1   | HPV981b01741A1   | HPV981b01441A1   | HPV981b01011A1   | HPV981b01741A1   | HPV981b01441A1   | HPV981b01011A1   | HPV981b01741A1   | HPV981b01441A1   | HPV981b01011A1   | HPV981b01741A1   | HPV981b01441A1   | HPV981b01011A1   | HPV981b01741A1   | HPV981b01441A1   | HPV981b01011A1   | HPV981b01741A1   | HPV981b01441A1   | HPV981b01011A1   | HPV981b01741A1   | HPV981b01441A1   | HPV981b01011A1   | HPV981b01741A1   | HPV981b01441A1   | HPV981b01011A1   | HPV981b01741A1   | HPV981b01441A1   | HPV981b01011A1   | HPV981b01741A1   | HPV981b01441A1   | HPV981b01011A1   |     |

| E6          | E7            | E8            | E9             | E10            | E11            | E12            | E13            | E14            | E15            | E16            | E17            | E18            | E19            | E20            | E21            | E22            | E23            | E24            | E25            | E26            | E27            | E28            | E29            | E30            | E31            | E32            | E33            | E34            | E35            | E36            | E37            | E38            | E39            | E40            | E41            | E42 |
|-------------|---------------|---------------|----------------|----------------|----------------|----------------|----------------|----------------|----------------|----------------|----------------|----------------|----------------|----------------|----------------|----------------|----------------|----------------|----------------|----------------|----------------|----------------|----------------|----------------|----------------|----------------|----------------|----------------|----------------|----------------|----------------|----------------|----------------|----------------|----------------|-----|
| 9           | 1             | 3             | 11             | 1              | 1              | 1              | 11             | 1              | 1111           | 2              | 2              | 3              | 3              | 33             | 333            | 3333           | 444            | 4              | 4444           | 4              | 4              | 4              | 4              | 4              | 4              | 4              | 4              | 4              | 4              | 4              | 4              | 4              | 4              | 4              | 4              | 4   |
| HPV981RF1A1 | HPV981b0471A1 | HPV981b0101A1 | HPV981b01741A1 | HPV981b01441A1 | HPV981b01011A1 | HPV981b01741A1 | HPV981b01441A1 | HPV981b01011A1 | HPV981b01741A1 | HPV981b01441A1 | HPV981b01011A1 | HPV981b01741A1 | HPV981b01441A1 | HPV981b01011A1 | HPV981b01741A1 | HPV981b01441A1 | HPV981b01011A1 | HPV981b01741A1 | HPV981b01441A1 | HPV981b01011A1 | HPV981b01741A1 | HPV981b01441A1 | HPV981b01011A1 | HPV981b01741A1 | HPV981b01441A1 | HPV981b01011A1 | HPV981b01741A1 | HPV981b01441A1 | HPV981b01011A1 | HPV981b01741A1 | HPV981b01441A1 | HPV981b01011A1 | HPV981b01741A1 | HPV981b01441A1 | HPV981b01011A1 |     |

1 deletion of 3 bp between nt. 3527 and 3529 within the E2 ORF;  
 1 deletion of 3 bp between nt. 3528 and 3529 within the E4 ORF;  
 1 deletion of 7 bp between nt. 1166 and 1172 within the UR region;  
 1 deletion of nt. 1198 and 1199 within the UR region;  
 5 insertion of 12 bp between nt. 7278 and 7280 within the UR region.
