# Supplementary material for: Evolution and Taxonomic Classification of Human Papillomavirus 16 (HPV16)-Related Variant Genomes: HPV31, HPV33, HPV35, HPV52, HPV58 and HPV67
Source: PubMed Central journal article supplement (PMC3103539; doi:10.1371/journal.pone.0020183), 2011-05-27

- - - 0.04 changes per site  
 — 0.002 changes per site

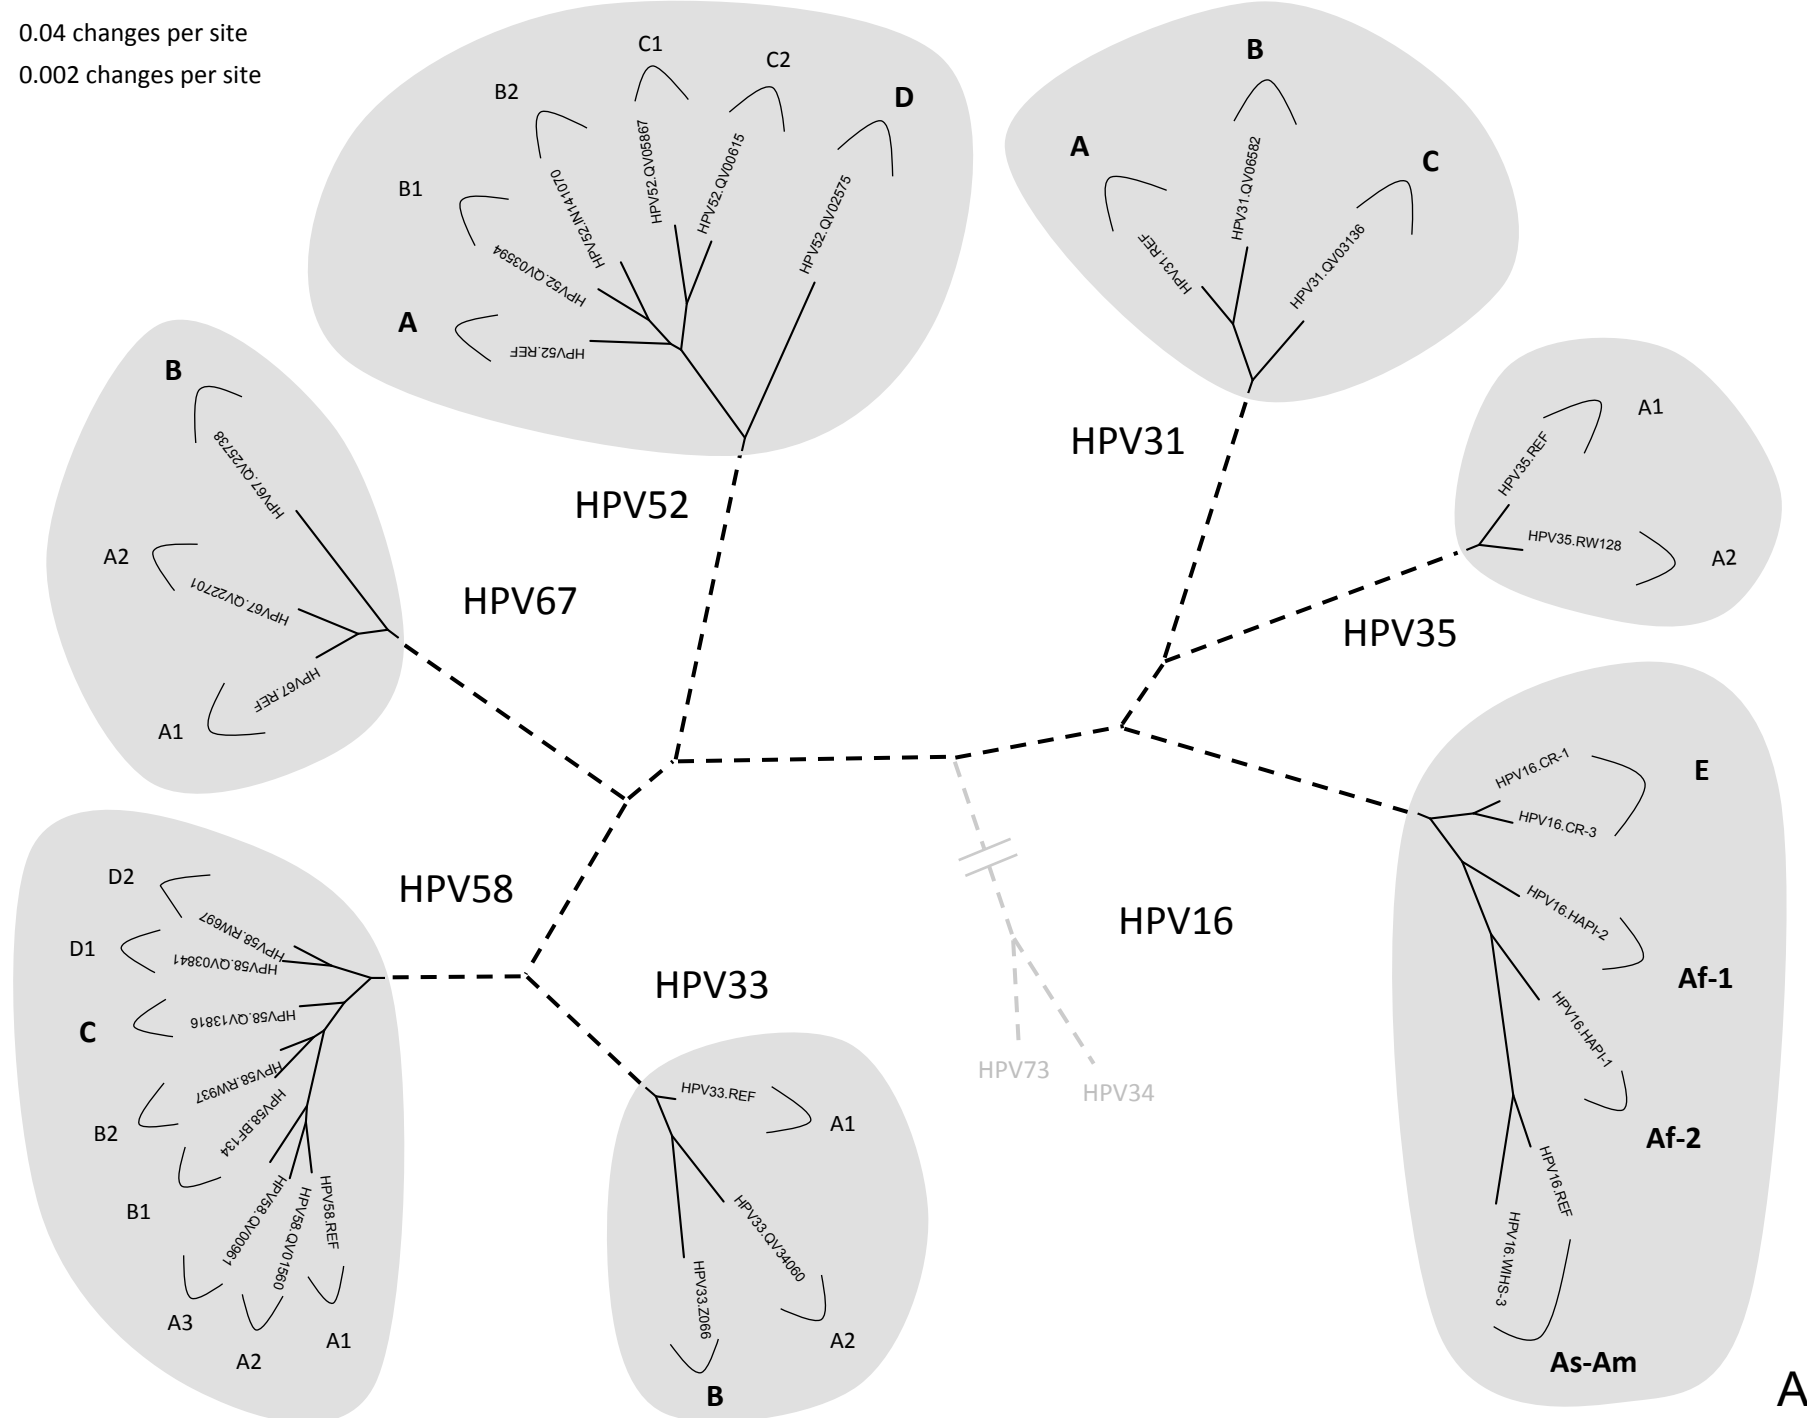

- - - 0.04 changes per site  
 — 0.002 changes per site

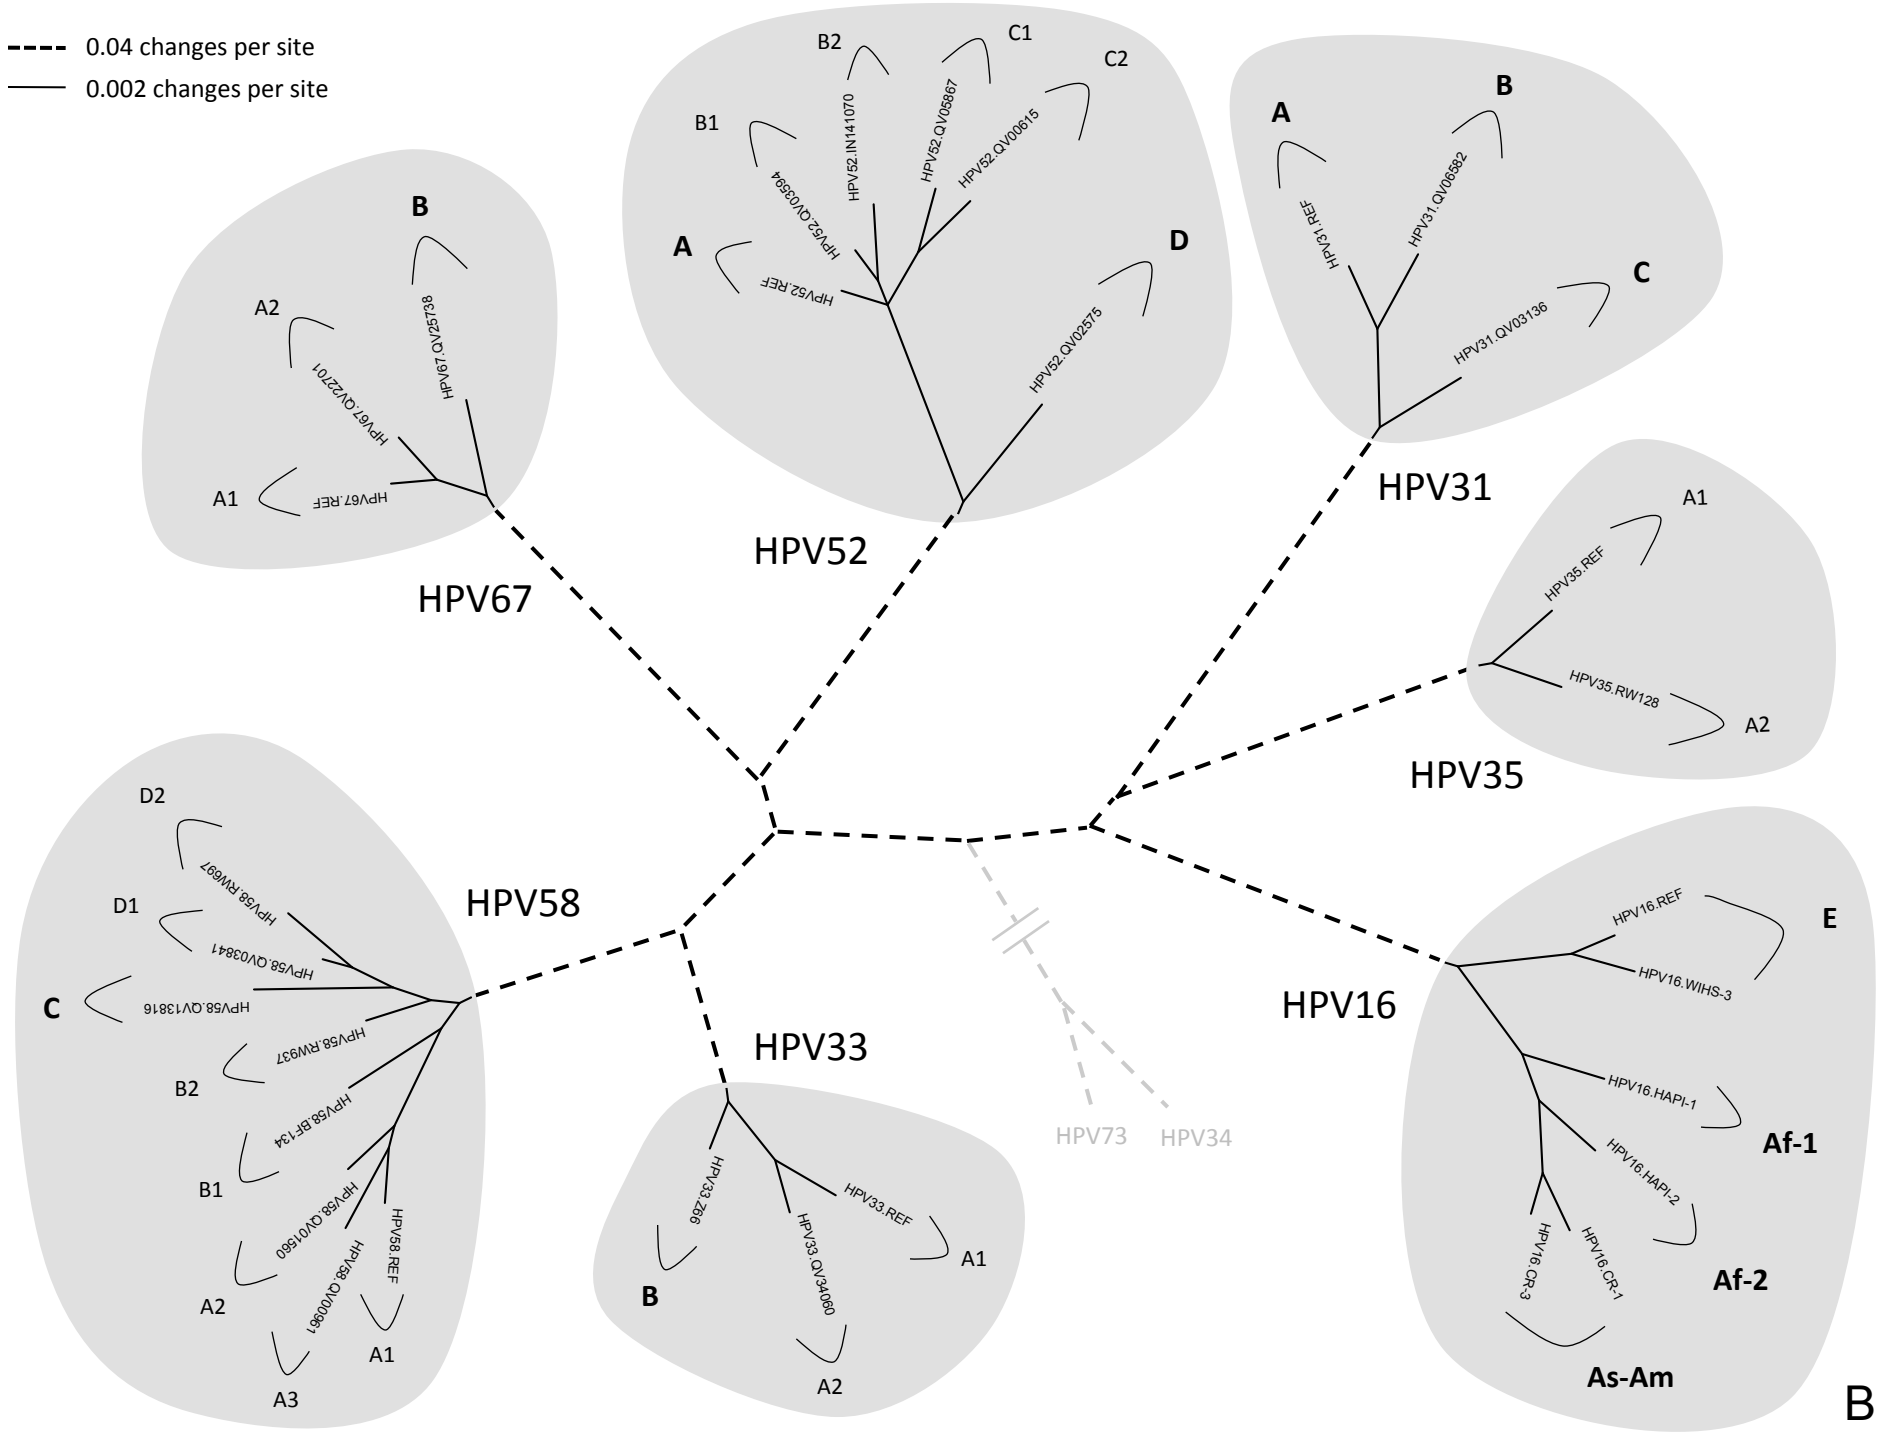

Supplement: pone.0020183.s003.pdf [file pone.0020183.s003.pdf]
