# Supplementary material for: Evolution and Taxonomic Classification of Human Papillomavirus 16 (HPV16)-Related Variant Genomes: HPV31, HPV33, HPV35, HPV52, HPV58 and HPV67
Source: PubMed Central journal article supplement (PMC3103539; doi:10.1371/journal.pone.0020183), 2011-05-27

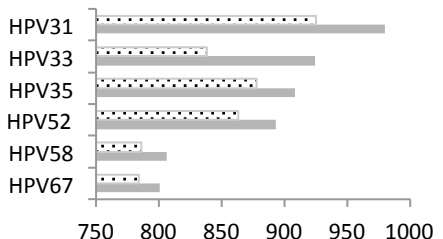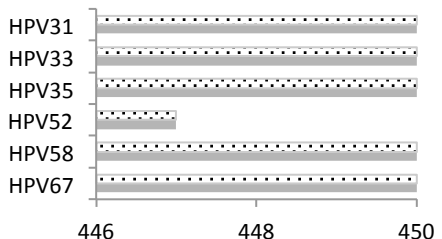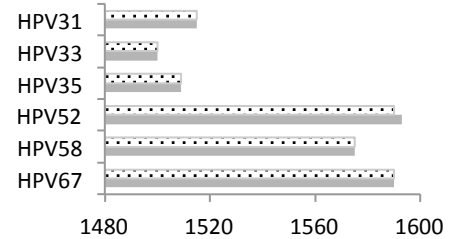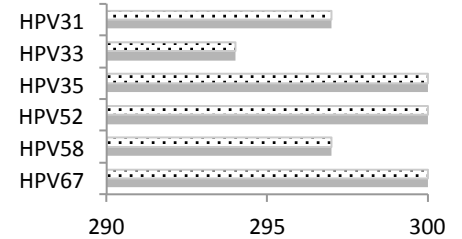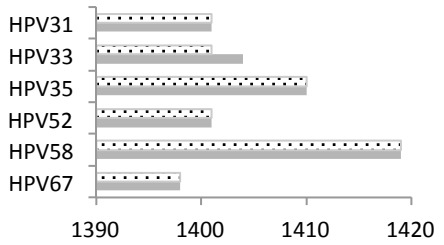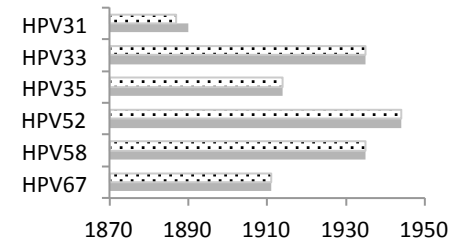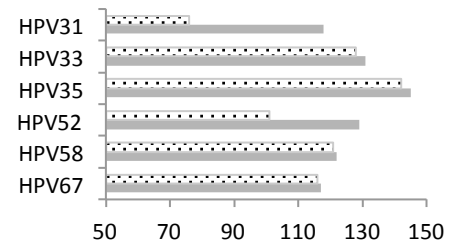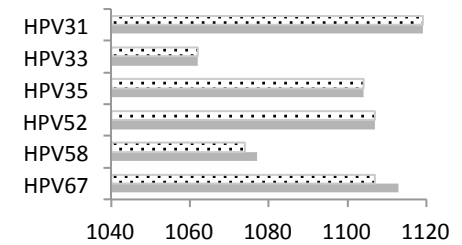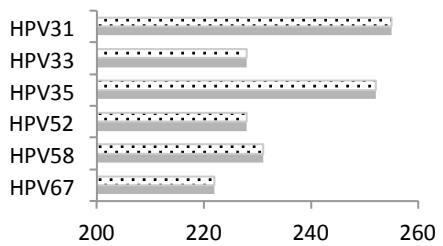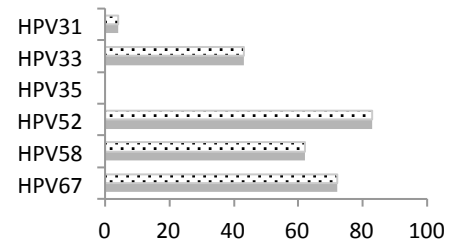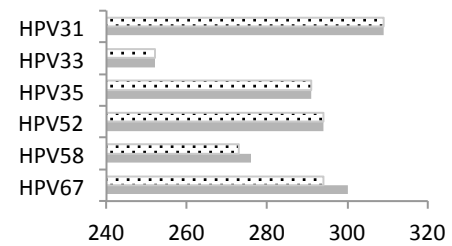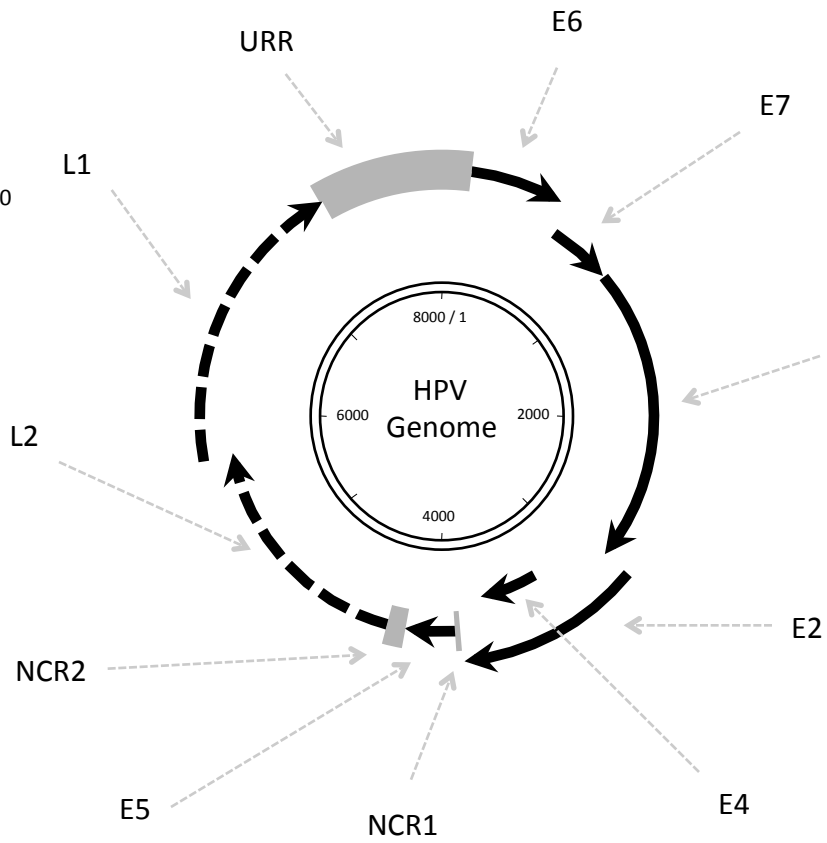

Supplement: pone.0020183.s004.pdf [file pone.0020183.s004.pdf]
