# Supplementary material for: Evolution and Taxonomic Classification of Human Papillomavirus 16 (HPV16)-Related Variant Genomes: HPV31, HPV33, HPV35, HPV52, HPV58 and HPV67
Source: PubMed Central journal article supplement (PMC3103539; doi:10.1371/journal.pone.0020183), 2011-05-27
Supplement: pone.0020183.s005.pdf [file pone.0020183.s005.pdf]

**Table S1. List of HPV genomes by type, isolate name, geographic origin of sample, lineage designation, length of complete genome and NCBI #.**

| HPV Type | Isolate ID | Origin       | Lineage | Sub-lineage | Length | NCBI #   |
|----------|------------|--------------|---------|-------------|--------|----------|
| HPV31    | HPV31REF   | -            | A       |             | 7912   | J04353*  |
| HPV31    | Z014       | Zambia       | A       |             | 7908   | HQ537666 |
| HPV31    | QV18335    | Costa Rica   | A       |             | 7920   | HQ537667 |
| HPV31    | IN453545   | Thailand     | A       |             | 7914   | HQ537668 |
| HPV31    | QV00071    | Costa Rica   | A       |             | 7908   | HQ537669 |
| HPV31    | QV02784    | Costa Rica   | A       |             | 7908   | HQ537670 |
| HPV31    | QV00215    | Costa Rica   | A       |             | 7908   | HQ537671 |
| HPV31    | QV02689    | Costa Rica   | A       |             | 7902   | HQ537672 |
| HPV31    | QV00168    | Costa Rica   | A       |             | 7902   | HQ537673 |
| HPV31    | QV14117    | Costa Rica   | A       |             | 7942   | HQ537674 |
| HPV31    | IN221709   | Thailand     | A       |             | 7945   | HQ537675 |
| HPV31    | QV03876    | Costa Rica   | B       |             | 7898   | HQ537676 |
| HPV31    | QV06582    | Costa Rica   | B       |             | 7898   | HQ537677 |
| HPV31    | RW687      | Rwanda       | B       |             | 7895   | HQ537678 |
| HPV31    | IN231831   | Thailand     | B       |             | 7892   | HQ537679 |
| HPV31    | QV17700    | Costa Rica   | B       |             | 7886   | HQ537680 |
| HPV31    | QV05335    | Costa Rica   | B       |             | 7892   | HQ537681 |
| HPV31    | QV03136    | Costa Rica   | C       |             | 7878   | HQ537682 |
| HPV31    | BF363      | Burkina Faso | C       |             | 7878   | HQ537683 |
| HPV31    | QV14043    | Costa Rica   | C       |             | 7878   | HQ537684 |
| HPV31    | QV00693    | Costa Rica   | C       |             | 7878   | HQ537685 |
| HPV31    | QV13734    | Costa Rica   | C       |             | 7878   | HQ537686 |
| HPV31    | QV12357    | Costa Rica   | C       |             | 7878   | HQ537687 |
| HPV33    | HPV33REF   | -            | A       | A1          | 7909   | M12732*  |
| HPV33    | QV32494    | Costa Rica   | A       | A1          | 7910   | HQ537688 |
| HPV33    | QV22751    | Costa Rica   | A       | A1          | 7912   | HQ537689 |
| HPV33    | QV35834    | Costa Rica   | A       | A1          | 7912   | HQ537690 |
| HPV33    | BF266      | Burkina Faso | A       | A1          | 7909   | HQ537691 |
| HPV33    | RW702      | Rwanda       | A       | A1          | 7909   | HQ537692 |
| HPV33    | Z84        | Zambia       | A       | A1          | 7909   | HQ537693 |
| HPV33    | RW926      | Rwanda       | A       | A1          | 7909   | HQ537694 |
| HPV33    | QV18347    | Costa Rica   | A       | A1          | 7911   | HQ537695 |
| HPV33    | QV06895    | Costa Rica   | A       | A1          | 7912   | HQ537696 |
| HPV33    | AS099      | China Taiwan | A       | A1          | 7908   | HQ537697 |
| HPV33    | QV34060    | Costa Rica   | A       | A2          | 7831   | HQ537698 |
| HPV33    | INCC0137   | Thailand     | A       | A2          | 7830   | HQ537699 |
| HPV33    | INJP06456  | Thailand     | A       | A2          | 7830   | HQ537700 |
| HPV33    | QV32431    | Costa Rica   | A       | A2          | 7833   | HQ537701 |
| HPV33    | RW136      | Rwanda       | B       |             | 7838   | HQ537702 |
| HPV33    | IN241890   | Thailand     | B       |             | 7830   | HQ537703 |
| HPV33    | Z066       | Zambia       | B       |             | 7830   | HQ537704 |
| HPV33    | QV23819    | Costa Rica   | B       |             | 7832   | HQ537705 |
| HPV33    | BF131      | Burkina Faso | B       |             | 7830   | HQ537706 |
| HPV33    | QV34189    | Costa Rica   | B       |             | 7830   | HQ537707 |
| HPV35    | HPV35REF   | -            | A       | A1          | 7879   | M74117*  |
| HPV35    | QV19083    | Costa Rica   | A       | A1          | 7879   | HQ537708 |
| HPV35    | QV24067    | Costa Rica   | A       | A1          | 7879   | HQ537709 |
| HPV35    | QV19086    | Costa Rica   | A       | A1          | 7879   | HQ537710 |
| HPV35    | QV24860    | Costa Rica   | A       | A1          | 7879   | HQ537711 |
| HPV35    | Z141       | Zambia       | A       | A1          | 7879   | HQ537712 |
| HPV35    | Z049       | Zambia       | A       | A1          | 7883   | HQ537713 |
| HPV35    | RW632      | Rwanda       | A       | A1          | 7894   | HQ537714 |
| HPV35    | QV28721    | Costa Rica   | A       | A1          | 7883   | HQ537715 |
| HPV35    | QV24366    | Costa Rica   | A       | A1          | 7894   | HQ537716 |

|       |          |                |   |    |      |           |
|-------|----------|----------------|---|----|------|-----------|
| HPV35 | IN221713 | Thailand       | A | A1 | 7894 | HQ537717  |
| HPV35 | BF266    | Burkina Faso   | A | A1 | 7894 | HQ537718  |
| HPV35 | RW807    | Rwanda         | A | A1 | 7885 | HQ537719  |
| HPV35 | RW862    | Rwanda         | A | A1 | 7885 | HQ537720  |
| HPV35 | RW656    | Rwanda         | A | A2 | 7879 | HQ537721  |
| HPV35 | BF313    | Burkina Faso   | A | A2 | 7881 | HQ537722  |
| HPV35 | BF223    | Burkina Faso   | A | A2 | 7876 | HQ537723  |
| HPV35 | IN272089 | Thailand       | A | A2 | 7878 | HQ537724  |
| HPV35 | BF314    | Burkina Faso   | A | A2 | 7879 | HQ537725  |
| HPV35 | BF025    | Burkina Faso   | A | A2 | 7879 | HQ537726  |
| HPV35 | RW128    | Rwanda         | A | A2 | 7879 | HQ537727  |
| HPV35 | Z147     | Zambia         | A | A2 | 7899 | HQ537728  |
| HPV35 | QV29782  | Costa Rica     | A | A2 | 7908 | HQ537729  |
| HPV35 | QV31639  | Costa Rica     | A | A2 | 7908 | HQ537730  |
| HPV52 | HPV52REF | -              | A |    | 7942 | X74481*   |
| HPV52 | QV32116  | Costa Rica     | A |    | 7937 | HQ537731  |
| HPV52 | QV26382  | Costa Rica     | A |    | 7937 | HQ537732  |
| HPV52 | QV23939  | Costa Rica     | A |    | 7937 | HQ537733  |
| HPV52 | QV32479  | Costa Rica     | A |    | 7937 | HQ537734  |
| HPV52 | RW846    | Rwanda         | A |    | 7937 | HQ537735  |
| HPV52 | Z096     | Zambia         | A |    | 7937 | HQ537736  |
| HPV52 | QV17972  | Costa Rica     | A |    | 7937 | HQ537737  |
| HPV52 | QV17844  | Costa Rica     | A |    | 7933 | HQ537738  |
| HPV52 | QV15145  | Costa Rica     | A |    | 7933 | HQ537739  |
| HPV52 | QV03594  | Costa Rica     | B | B1 | 7962 | HQ537740  |
| HPV52 | QV00585  | Costa Rica     | B | B1 | 7951 | HQ537741  |
| HPV52 | IN181391 | Thailand       | B | B2 | 7944 | HQ537742  |
| HPV52 | IN141070 | Thailand       | B | B2 | 7960 | HQ537743  |
| HPV52 | TJ49     | China Tianjing | B | B2 | 7960 | GQ472848* |
| HPV52 | QV05867  | Costa Rica     | C | C1 | 7974 | HQ537744  |
| HPV52 | QV03719  | Costa Rica     | C | C2 | 7962 | HQ537745  |
| HPV52 | QV00615  | Costa Rica     | C | C2 | 7962 | HQ537746  |
| HPV52 | QV12377  | Costa Rica     | D |    | 7937 | HQ537747  |
| HPV52 | QV02575  | Costa Rica     | D |    | 7937 | HQ537748  |
| HPV52 | QV02124  | Costa Rica     | D |    | 7951 | HQ537749  |
| HPV52 | QV18359  | Costa Rica     | D |    | 7951 | HQ537750  |
| HPV52 | QV07294  | Costa Rica     | D |    | 7934 | HQ537751  |
| HPV58 | HPV58REF | -              | A | A1 | 7824 | D90400*   |
| HPV58 | LZCC86   | China Gansu    | A | A1 | 7824 | EU918765* |
| HPV58 | SC100    | China Sichuan  | A | A1 | 7824 | FJ385261* |
| HPV58 | SC101    | China Sichuan  | A | A1 | 7824 | FJ385262* |
| HPV58 | SC144    | China Sichuan  | A | A1 | 7824 | FJ385264* |
| HPV58 | SC147    | China Sichuan  | A | A1 | 7824 | FJ385263* |
| HPV58 | SC165    | China Sichuan  | A | A1 | 7824 | FJ385265* |
| HPV58 | SC174    | China Sichuan  | A | A1 | 7824 | FJ385266* |
| HPV58 | SC185    | China Sichuan  | A | A1 | 7836 | FJ385267* |
| HPV58 | SC078    | China Sichuan  | A | A1 | 7824 | FJ385268* |
| HPV58 | TJ18     | China Tianjing | A | A2 | 7824 | GQ47285*  |
| HPV58 | QV15606  | Costa Rica     | A | A2 | 7824 | HQ537752  |
| HPV58 | RW791    | Rwanda         | A | A2 | 7824 | HQ537753  |
| HPV58 | QV03554  | Costa Rica     | A | A2 | 7824 | HQ537754  |
| HPV58 | QV00861  | Costa Rica     | A | A2 | 7824 | HQ537755  |
| HPV58 | QV15563  | Costa Rica     | A | A3 | 7836 | HQ537756  |
| HPV58 | QV32351  | Costa Rica     | A | A3 | 7836 | HQ537757  |
| HPV58 | QV00961  | Costa Rica     | A | A3 | 7836 | HQ537758  |
| HPV58 | AS405    | China Taiwan   | A | A3 | 7836 | HQ537759  |
| HPV58 | AS347    | China Taiwan   | A | A3 | 7836 | HQ537760  |
| HPV58 | BF077    | Burkina Faso   | B | B1 | 7823 | HQ537761  |

|       |          |              |   |    |      |          |
|-------|----------|--------------|---|----|------|----------|
| HPV58 | BF134    | Burkina Faso | B | B1 | 7823 | HQ537762 |
| HPV58 | Z023     | Zambia       | B | B1 | 7823 | HQ537763 |
| HPV58 | RW937    | Rwanda       | B | B2 | 7825 | HQ537764 |
| HPV58 | RW754    | Rwanda       | B | B2 | 7825 | HQ537765 |
| HPV58 | QV03858  | Costa Rica   | D | D1 | 7814 | HQ537766 |
| HPV58 | QV04732  | Costa Rica   | D | D1 | 7814 | HQ537767 |
| HPV58 | QV03841  | Costa Rica   | D | D1 | 7814 | HQ537768 |
| HPV58 | RW841    | Rwanda       | D | D2 | 7817 | HQ537769 |
| HPV58 | RW697    | Rwanda       | D | D2 | 7817 | HQ537770 |
| HPV58 | RW063    | Rwanda       | D | D2 | 7817 | HQ537771 |
| HPV58 | QV34982  | Costa Rica   | C |    | 7820 | HQ537772 |
| HPV58 | QV03666  | Costa Rica   | C |    | 7820 | HQ537773 |
| HPV58 | QV13816  | Costa Rica   | C |    | 7820 | HQ537774 |
| HPV58 | RW792    | Rwanda       | C |    | 7820 | HQ537775 |
| HPV58 | RW644    | Rwanda       | C |    | 7820 | HQ537776 |
| HPV58 | Z094     | Zambia       | C |    | 7820 | HQ537777 |
| HPV67 | HPV67REF | -            | A | A1 | 7801 | D21208*  |
| HPV67 | QV25560  | Costa Rica   | A | A1 | 7819 | HQ537778 |
| HPV67 | QV31430  | Costa Rica   | A | A1 | 7819 | HQ537779 |
| HPV67 | QV22701  | Costa Rica   | A | A2 | 7803 | HQ537780 |
| HPV67 | QV33023  | Costa Rica   | A | A2 | 7803 | HQ537781 |
| HPV67 | QV24827  | Costa Rica   | B |    | 7809 | HQ537782 |
| HPV67 | QV25738  | Costa Rica   | B |    | 7809 | HQ537783 |
| HPV67 | QV30703  | Costa Rica   | B |    | 7809 | HQ537784 |

\* Sequenced obtained from NCBI/GenBank Database.
