# Supplementary material for: Evolution and Taxonomic Classification of Human Papillomavirus 16 (HPV16)-Related Variant Genomes: HPV31, HPV33, HPV35, HPV52, HPV58 and HPV67
Source: PubMed Central journal article supplement (PMC3103539; doi:10.1371/journal.pone.0020183), 2011-05-27
Supplement: pone.0020183.s006.pdf [file pone.0020183.s006.pdf]

**Table S2. Nucleotide sequence mean difference ( $\pm$  standard error) of HPV16-related alpha-9 HPV complete genomes. The intra-lineage (e.g., A vs. A) and intra-sublineage (e.g., A1 vs. A1) difference values are highlighted in gray.**

| <b>HPV31</b> | A               | B               | C               |
|--------------|-----------------|-----------------|-----------------|
| A            | 0.27 $\pm$ 0.03 |                 |                 |
| B            | 0.86 $\pm$ 0.09 | 0.27 $\pm$ 0.04 |                 |
| C            | 1.15 $\pm$ 0.11 | 1.19 $\pm$ 0.12 | 0.42 $\pm$ 0.05 |

| <b>HPV33</b> | A               | B               |
|--------------|-----------------|-----------------|
| A            | 0.39 $\pm$ 0.04 |                 |
| B            | 0.94 $\pm$ 0.08 | 0.17 $\pm$ 0.02 |

| <b>HPV35</b> | A               |
|--------------|-----------------|
| A            | 0.35 $\pm$ 0.04 |

| <b>HPV52</b> | A               | B               | C               | D               |
|--------------|-----------------|-----------------|-----------------|-----------------|
| A            | 0.19 $\pm$ 0.03 |                 |                 |                 |
| B            | 0.80 $\pm$ 0.08 | 0.43 $\pm$ 0.05 |                 |                 |
| C            | 0.96 $\pm$ 0.10 | 1.08 $\pm$ 0.09 | 0.54 $\pm$ 0.06 |                 |
| D            | 1.75 $\pm$ 0.15 | 1.80 $\pm$ 0.15 | 2.00 $\pm$ 0.14 | 0.13 $\pm$ 0.03 |

| <b>HPV58</b> | A               | B               | C               | D               |
|--------------|-----------------|-----------------|-----------------|-----------------|
| A            | 0.47 $\pm$ 0.04 |                 |                 |                 |
| B            | 1.12 $\pm$ 0.08 | 0.48 $\pm$ 0.05 |                 |                 |
| C            | 1.40 $\pm$ 0.11 | 1.05 $\pm$ 0.09 | 0.20 $\pm$ 0.03 |                 |
| D            | 1.35 $\pm$ 0.12 | 0.93 $\pm$ 0.08 | 0.95 $\pm$ 0.10 | 0.42 $\pm$ 0.05 |

| <b>HPV67</b> | A               | B               |
|--------------|-----------------|-----------------|
| A            | 0.36 $\pm$ 0.05 |                 |
| B            | 1.00 $\pm$ 0.09 | 0.22 $\pm$ 0.04 |

| <b>HPV33</b> | A1        | A2        |  |  |  |  |
|--------------|-----------|-----------|--|--|--|--|
| A1           | 0.24±0.03 |           |  |  |  |  |
| A2           | 0.62±0.07 | 0.13±0.03 |  |  |  |  |

  

| <b>HPV35</b> | A1        | A2        |  |  |  |  |
|--------------|-----------|-----------|--|--|--|--|
| A1           | 0.21±0.03 |           |  |  |  |  |
| A2           | 0.48±0.06 | 0.24±0.03 |  |  |  |  |

  

| <b>HPV52</b> | B1        | B2        | C1        | C2        |  |  |  |
|--------------|-----------|-----------|-----------|-----------|--|--|--|
| B1           | 0.13±0.04 |           |           |           |  |  |  |
| B2           | 0.59±0.08 | 0.20±0.04 |           |           |  |  |  |
| C1           |           |           | n/c       |           |  |  |  |
| C2           |           |           | 0.62±0.07 | 0.39±0.07 |  |  |  |

  

| <b>HPV58</b> | A1        | A2        | A3        | B1        | B2        | D1        | D2        |
|--------------|-----------|-----------|-----------|-----------|-----------|-----------|-----------|
| A1           | 0.24±0.03 |           |           |           |           |           |           |
| A2           | 0.60±0.06 | 0.27±0.03 |           |           |           |           |           |
| A3           | 0.54±0.07 | 0.70±0.08 | 0.14±0.03 |           |           |           |           |
| B1           |           |           |           | 0.16±0.04 |           |           |           |
| B2           |           |           |           | 0.71±0.07 | 0.12±0.04 |           |           |
| D1           |           |           |           |           |           | 0.15±0.03 |           |
| D2           |           |           |           |           |           | 0.58±0.07 | 0.22±0.04 |

  

| <b>HPV67</b> | A1        | A2        |  |  |  |  |
|--------------|-----------|-----------|--|--|--|--|
| A1           | 0.27±0.04 |           |  |  |  |  |
| A2           | 0.45±0.07 | 0.08±0.04 |  |  |  |  |
